# Supplementary material for: CCL18 signaling from tumor-associated macrophages activates fibroblasts to adopt a chemoresistance-inducing phenotype
Source: PubMed Central journal article supplement (PMC9836934; doi:10.1038/s41388-022-02540-2), 2022-11-22
Supplement: 41388_2022_2540_MOESM1_ESM.pdf [file 41388_2022_2540_MOESM1_ESM.pdf]

1 **CCL18 signaling from tumor-associated macrophages activates**  
2 **fibroblasts to adopt a chemoresistance-inducing phenotype**

3

4 Wenfeng Zeng<sup>1,2,3,#</sup>, Lixiong Xiong<sup>4,#</sup>, Wei Wu<sup>1,2,3,#</sup>, Shunrong Li<sup>1,2,3</sup>, Jiang Liu<sup>1,2,3</sup>,  
5 Linbing Yang<sup>1,2,3</sup>, Liyan Lao<sup>1,2,3</sup>, Penghan Huang<sup>1,2,3</sup>, Mengmeng Zhang<sup>5</sup>, Huiping  
6 Chen<sup>1,2,3</sup>, Nanyan Miao<sup>1,2,3</sup>, Zhirong Lin<sup>1,2,3</sup>, Zifei Liu<sup>1,2,3</sup>, Xinyu Yang<sup>1,2,3</sup>, Jiayi  
7 Wang<sup>1,2,3</sup>, Pei Wang<sup>1,2,3</sup>, Erwei Song<sup>1,2,3</sup>, Yandan Yao<sup>1,2,3\*</sup>, Yan Nie<sup>1,2,3\*</sup>, Jianing  
8 Chen<sup>1,2,3\*</sup>, Di Huang<sup>1,2,3\*</sup>

9



15 **A**, Representative images of immunofluorescent staining of  $\alpha$ -SMA, CD10 and GPR77  
16 in the pre-treatment breast cancer biopsies of chemosensitive (n=3) and chemoresistant  
17 (n=3) patients. Scale bars, 50  $\mu$ m. **B**, Flow cytometric analysis for CD10 and GPR77  
18 in primary normal NBFs, MSCs, pericytes, adipocytes, epithelial cells and endothelial  
19 cells treated with chemoresistant or chemosensitive tumor CM. **C**, Quantification of  
20 Fig.1B: relative  $\alpha$ -SMA, FAP, CD10 and GPR77 protein levels in NBFs treated with  
21 chemoresistant (n=3) or chemosensitive (n=3) tumor CM was quantified using Image  
22 J. Protein levels were normalized to GAPDH. **D**, Quantification of Fig.1C: mean  
23 fluorescence intensity (MFI) of CD10 and GPR77 in NBFs treated with chemoresistant  
24 (n=3) or chemosensitive (n=3) tumor CM was quantified using Flowjo. **E**, QRT-PCR  
25 for ACTA2, FAP, COL1A1, COL3A1, CD10, GPR77, IL-6 and IL-8 in NBFs treated  
26 with chemoresistant (n=3) or chemosensitive (n=3) tumor CM. **F**, ELISA for IL-6, IL-  
27 8 and CCL18 levels in the CM of chemoresistant (n=3) and chemosensitive tumors  
28 (n=3). **G-H**, QRT-PCR(**G**) and mean fluorescence intensity (**H**) for CD10 and GPR77  
29 in NBFs treated with chemosensitive tumor CM or chemoresistant tumor CM added  
30 without or with neutralizing antibodies against IL6, IL8 or CCL18.  
31 Data expressed as mean  $\pm$  SEM, \*P<0.05, \*\*P < 0.01 compared with chemosensitive  
32 tumor CM by two-tailed Student's t test (**F**). Data expressed as mean  $\pm$  SEM, \*P< 0.05,  
33 \*\*P < 0.01, \*\*\*P < 0.001 compared with untreated NBFs (Ctrl) by two-tailed one-way  
34 ANOVA with Dunnett's multiple comparison test (**C-E**, **G-H**).

35

**Fig.S2**

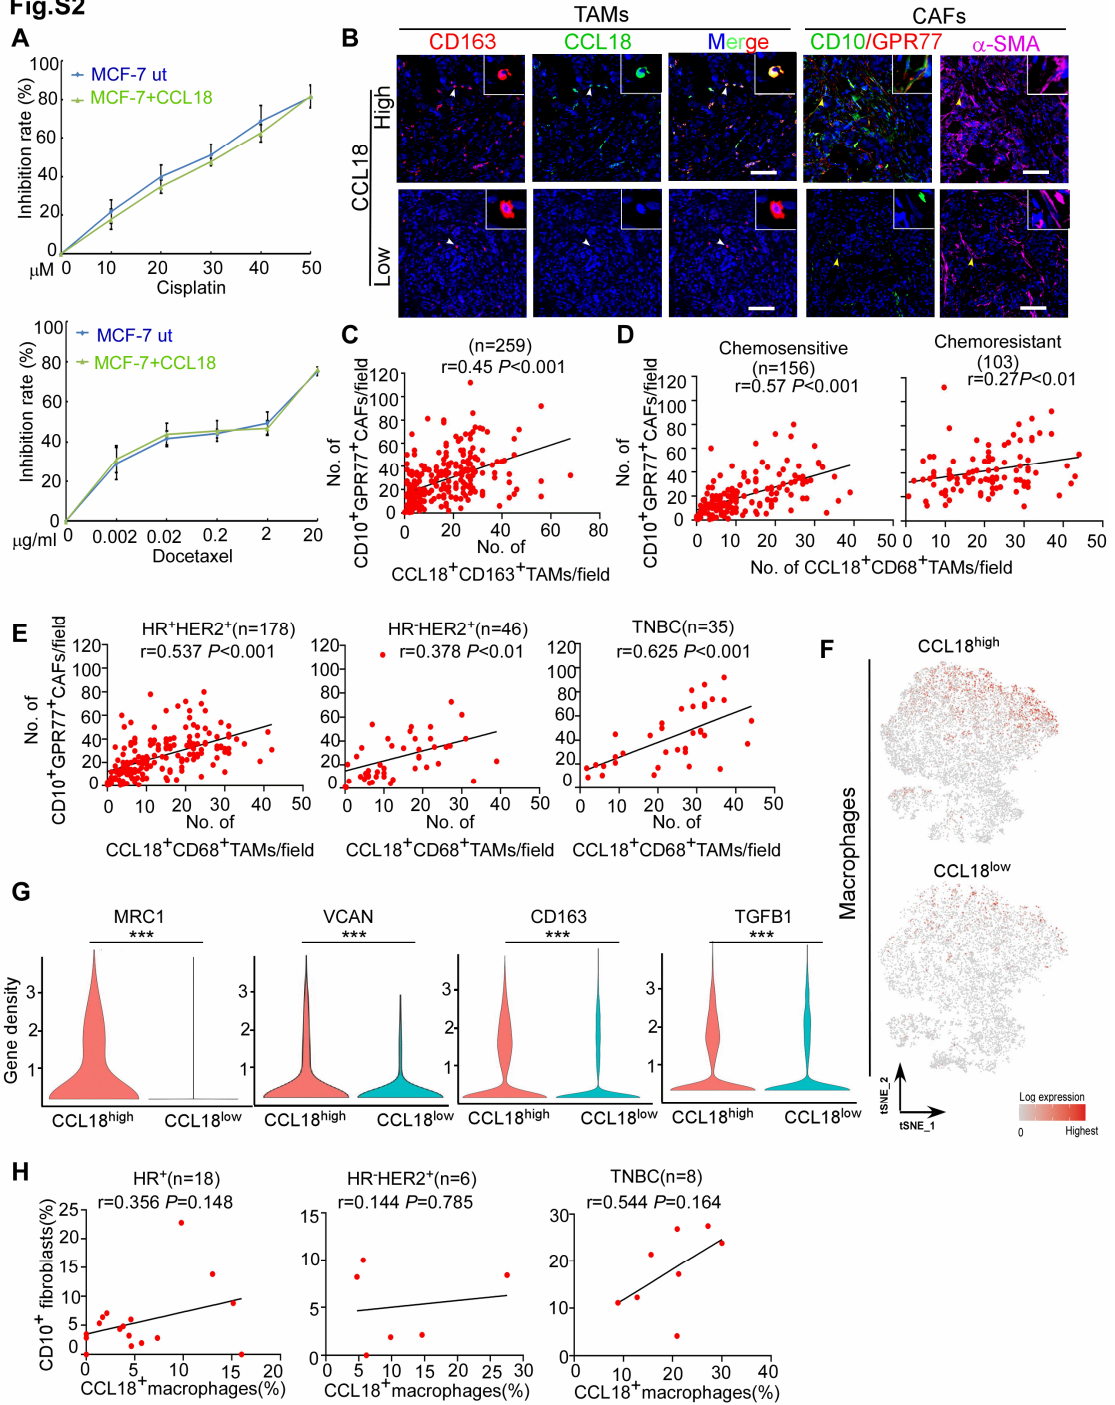

36

37 **Figure S2. The intratumoral accumulation of CCL18<sup>+</sup> tumor-associated**  
 38 **macrophages is associated with the abundance of CD10<sup>+</sup>GPR77<sup>+</sup> CAFs and**  
 39 **chemoresistance, related to Figure 2**

40 **A, The growth inhibition rate of cisplatin (up) or docetaxel (down) on MCF-7 cells**  
 41 **treated without or with CCL18 (n=3). Data expressed as mean  $\pm$  SEM, P > 0.1 by two-**

42 tailed Student's t test. **B**, Representative images of immunofluorescent staining of  
43 CD163, CCL18, CD10, GPR77 and  $\alpha$ -SMA in serial sections of breast cancer samples  
44 with high or low CCL18 expression (n=259). Scale bars, 50  $\mu$ m. The arrowheads denote  
45 the area of higher-magnification images shown in the top-right corner. **C**, The  
46 correlation between the abundance of CD10<sup>+</sup>GPR77<sup>+</sup> CAFs and CD163<sup>+</sup>CCL18<sup>+</sup>  
47 TAMs in breast cancer samples. The Pearson's correlation coefficient *r* value and *P*  
48 values were determined by two-tailed Pearson correlation coefficient test (n=259). **D-**  
49 **E**, Stratification analysis of the correlation between the abundance of CD10<sup>+</sup>GPR77<sup>+</sup>  
50 CAFs and CD68<sup>+</sup>CCL18<sup>+</sup> TAMs in breast tumors with different chemotherapeutic  
51 responses (**D**) and molecular subtypes(**E**). HR, hormone receptor. HER2, human  
52 epidermal growth factor receptor-2. TNBC, triple negative breast cancer. The Pearson's  
53 correlation coefficient *r* value and *P* values were determined by two-tailed Pearson  
54 correlation coefficient test. **F**, t-SNE layout of CCL18 expression in divided CCL18<sup>high</sup>  
55 and CCL18<sup>low</sup> patients from pancancer TME blueprint and GEO: GSE161529. **G**,  
56 Violin plots indicating the expression of MRC1, VCAN, CD163 and TGFB1 in  
57 macrophages of CCL18<sup>high</sup> or CCL18<sup>low</sup> patients. \*\*\**P* < 0.001 compared with  
58 CCL18<sup>low</sup> patients by Student's t test. **H**, The correlation between the abundance of  
59 CD10<sup>+</sup>fibroblasts and the infiltration of CCL18<sup>+</sup> macrophages in breast cancer with  
60 different molecular subtypes based on scRNA-seq transcriptomes from GEO:  
61 GSE161529. The Pearson's correlation coefficient *r* value and *P* values were  
62 determined by two-tailed Pearson correlation coefficient test.

63

**Fig.S3**

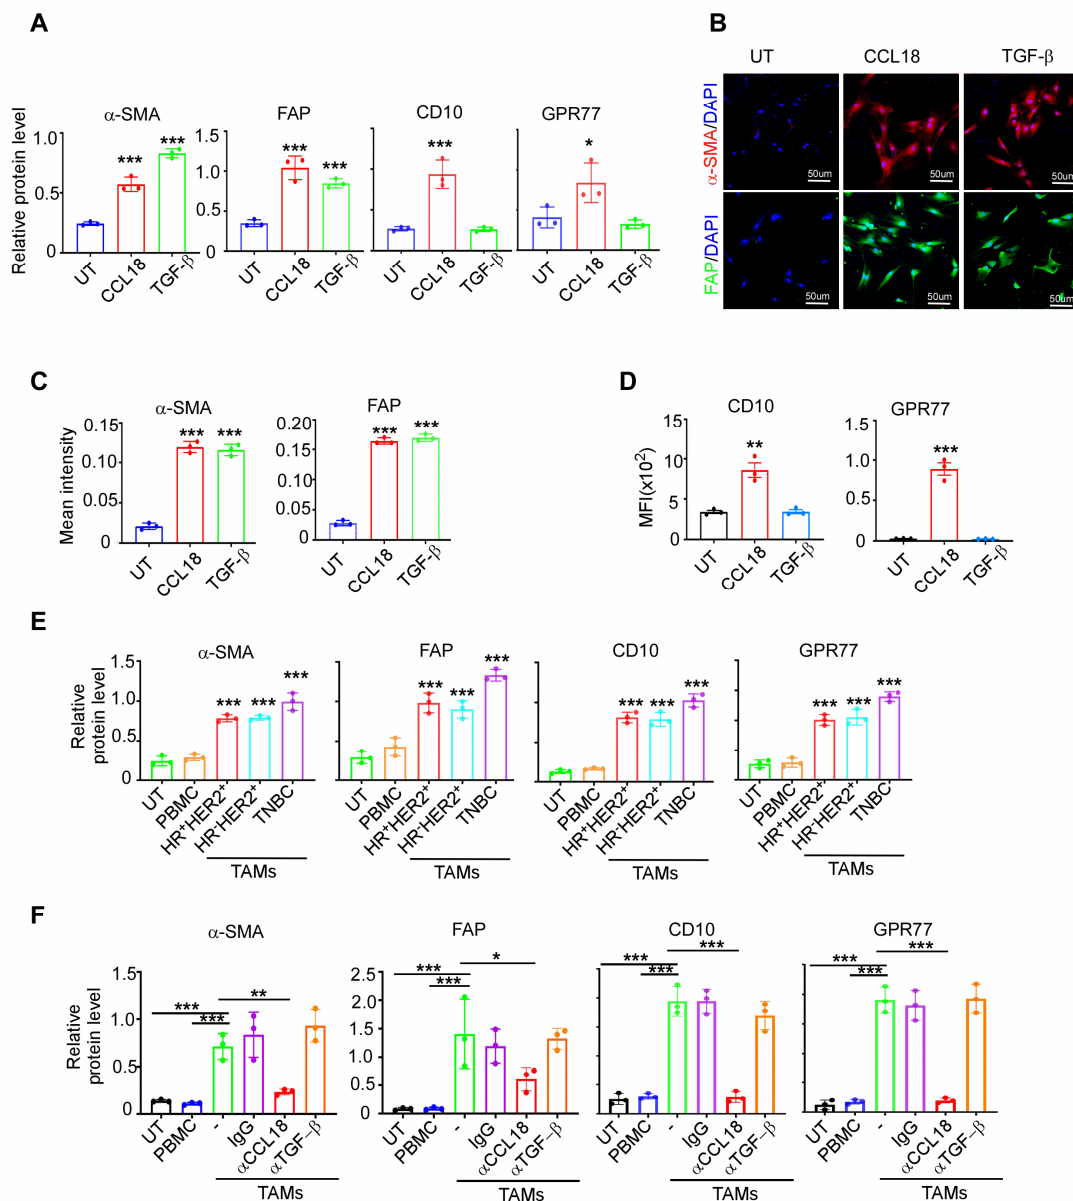

64

65 **Figure S3. CCL18 produced by TAMs mediates the chemoresistance-inducing**  
 66 **phenotype polarization in NBFs, related to Figure 3**

67 **A**, Quantification of Fig.3C: relative α-SMA, FAP, CD10 and GPR77 protein levels in  
 68 NBFs with indicated treatment were quantified using ImageJ (n=3). Protein levels were  
 69 normalized to GAPDH. **B-C**, Representative immunofluorescent images(**B**) and mean  
 70 fluorescent intensity(**C**) for α-SMA and FAP in NBFs with indicated treatment (n=3).  
 71 Scale bars, 50 μm. **D**, Quantification of Fig.3D: mean fluorescence intensity for CD10

72 and GPR77 in NBFs with indicated treatment. **E**, Quantification of Fig.3E: relative  $\alpha$ -  
73 SMA, FAP, CD10 and GPR77 protein levels in NBFs cultured alone (UT) or co-  
74 cultured with PBMC or TAMs isolated from different subtypes of breast cancer (n=3).  
75 **F**, Quantification of Fig.3F: relative  $\alpha$ -SMA, FAP, CD10 and GPR77 protein levels in  
76 NBFs cultured alone (UT) or co-cultured with PBMC or TAMs pretreated with control  
77 IgG or neutralizing antibodies against CCL18 or TGF- $\beta$  (n=3).  
78 Data expressed as mean  $\pm$  SEM, \*P< 0.05, \*\*P< 0.01, \*\*\*P < 0.001 compared with  
79 untreated NBFs (**A**, **C-E**) or NBFs co-cultured with untreated TAMs (**F**) by two-tailed  
80 one-way ANOVA with Dunnett's multiple comparison test.

81

**Fig.S4**

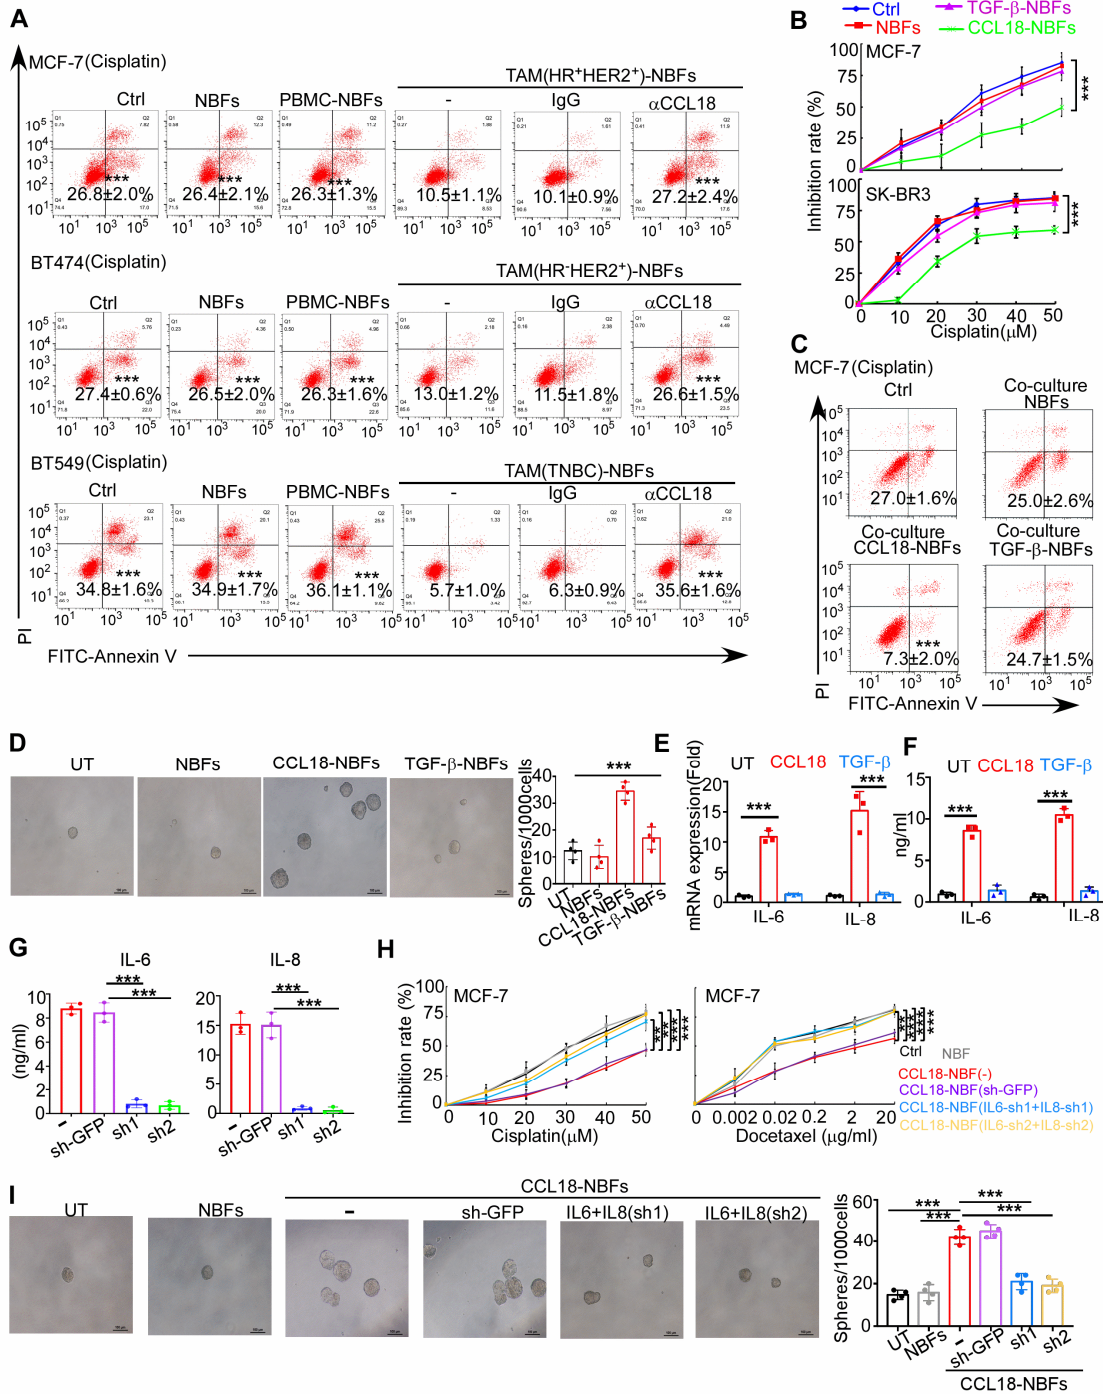

82

83 **Figure S4. NBFs activated by CCL18-producing TAMs mediate chemoresistance**

84 **and CSC enrichment by secreting IL-6 and IL-8, related to Figure 4**

85 **A**, The proportion of apoptotic breast cancer cells treated with cisplatin, cultured alone

86 (Ctrl) or co-cultured with the fibroblasts with indicated treatment. The proportion of

87 Annexin V<sup>+</sup>/PI<sup>-</sup> (early apoptosis) and Annexin V<sup>+</sup>/PI<sup>+</sup> (late apoptosis) cells was shown



88 (n=3). **B**, The growth inhibition rate of cisplatin on MCF-7 (up) and SK-BR3 (down)  
89 cells cultured alone (Ctrl) or co-cultured with untreated or CCL18/TGF- $\beta$  treated NBFs  
90 (n=3). **C**, The proportion of apoptotic MCF-7 cells, cultured alone (Ctrl) or co-cultured  
91 with indicated fibroblasts, challenged by cisplatin (n=3). **D**, Representative images (left)  
92 and quantification(right) of sphere formation in MCF-7 cultured alone or co-cultured  
93 with indicated NBFs (n=4). Scale bars, 100  $\mu$ m. **E-F**, QRT-PCR(**E**) and ELISA(**F**) for  
94 IL-6 and IL-8 in NBFs with indicated treatment (n=3). **G**, ELISA for IL-6 and IL-8 in  
95 MCF-7 cultured alone or co-cultured with untreated or CCL18-treated NBFs  
96 transduced with shRNA against GFP, IL-6 and IL-8 (n=3). **H**, The growth inhibition  
97 rate of cisplatin (left) and docetaxel (right) on MCF-7 cultured alone or co-cultured  
98 with untreated or CCL18-treated NBFs transduced with shRNA against GFP, IL-6 and  
99 IL-8 (n=3). **I**, The sphere formation of MCF-7 cells cultured alone or co-cultured with  
100 NBFs treated as in **H** (n=3).

101 Data expressed as mean  $\pm$  SEM, \*\*\*P< 0.001 compared with NBFs co-cultured with  
102 untreated TAMs(**A**), untreated NBFs (**B-F**) or CCL18-treated NBFs without  
103 transducing (**G-I**) by two-tailed one-way ANOVA with Dunnett's multiple comparison  
104 test.

**Fig.S5**

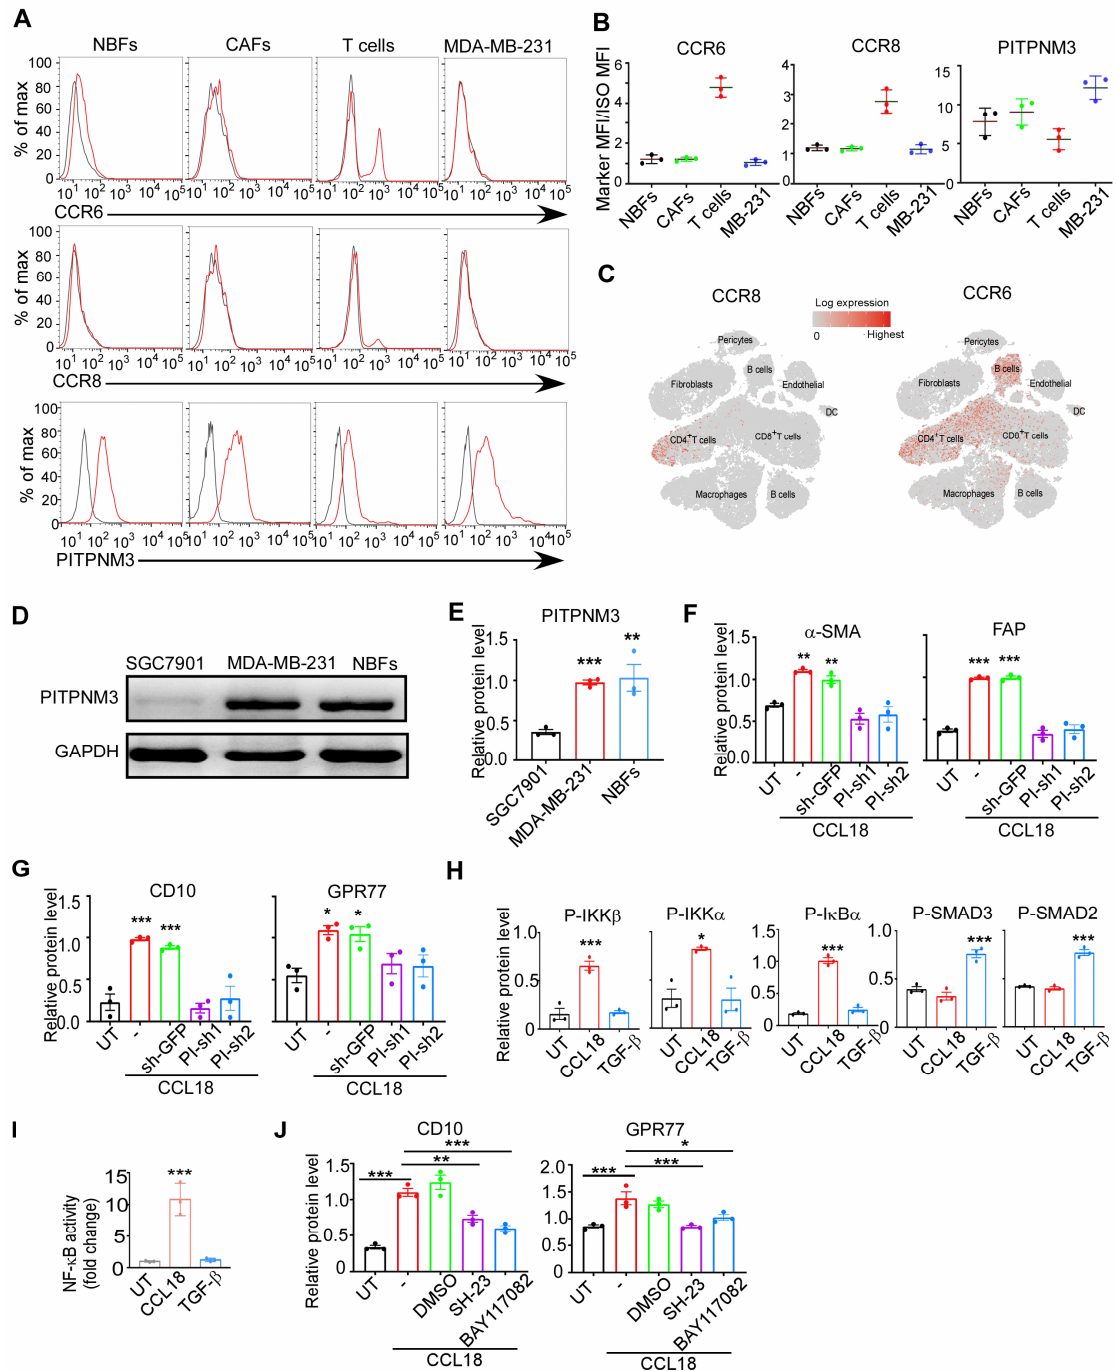

105

106 **Figure S5. PITPNM3 mediates CCL18-induced fibroblast activation via NF-κB**

107 **signaling, related to Figure 5**

108 **A-B**, Representative flow cytometric analysis(A) and quantification of relative MFI (B)

109 for CCR6, CCR8 and PITPNM3 in NBFs, CAFs, T cells and MDA-MB-231 breast

110 cancer cells(n=3). Grey line, isotype. Red line, CCR6/CCR8/PITPNM3. Relative MFI

111 were normalized using isotype MFI as loading control. **C**, Expression plots of CCR6  
112 and CCR8 in microenvironment populations derived from scRNA-seq transcriptomes  
113 data were exhibited by t-SNE layout. **D-E**, Representative western blotting (**D**) and  
114 quantification (**E**) for the expression of PITPNM3 in NBFs, SGC7901 or MDA-MB-  
115 231 (n=3). **F-G**, Quantification of Fig.5A: relative  $\alpha$ -SMA(**F**), FAP(**F**), CD10(**G**) and  
116 GPR77(**G**) protein levels in untreated or CCL18-treated NBFs transduced with GFP  
117 shRNA or PITPNM3 shRNAs (n=3). **H**, Quantification of Fig.5C: relative levels of  
118 phosphorylated IKK $\beta$ , IKK $\alpha$ , I $\kappa$ B $\alpha$ , SMAD2 and SMAD3 in NBFs with indicated  
119 treatment was quantified using ImageJ (n=3). Protein levels were normalized to  
120 GAPDH. **I**, Luciferase reporter assays for NF- $\kappa$ B activity in NBFs with indicated  
121 treatment (n=3). **J**, Quantification of Fig.5G: relative CD10 and GPR77 protein levels  
122 in untreated (UT) or CCL18-activated NBFs treated with DMSO, JSH-23 or  
123 BAY117082 (n=3).

124 Data expressed as Mean  $\pm$  SEM, \*P< 0.05, \*\*P< 0.01, \*\*\*P < 0.001 compared with  
125 SGC7901(**E**), untreated NBFs(**F-I**) or untreated CCL18-activated NBFs (**J**) by two-  
126 tailed one-way ANOVA with Dunnett's multiple comparison test.

127

Fig.S6

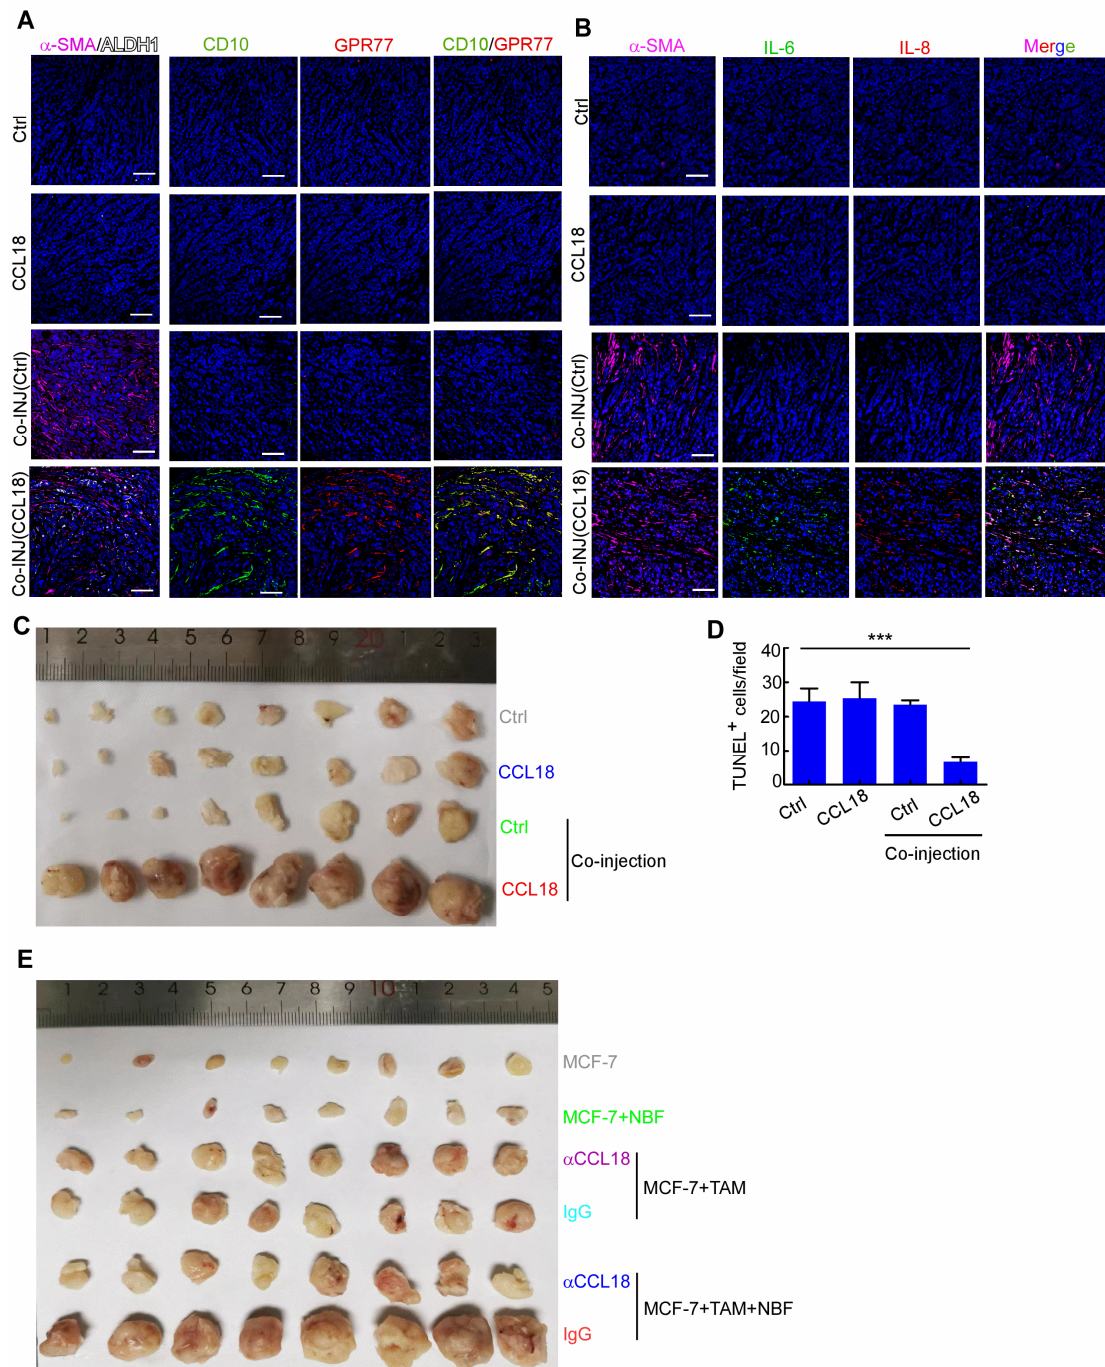

128

129 **Figure S6. CCL18 promotes breast cancer tumorigenesis and chemoresistance in**  
130  **vivo by activating NBFs, related to Figure 6**

131 **A-B**, Representative immunofluorescent images for (A)  $\alpha$ -SMA, ALDH1, CD10 and

132 GPR77, (B)  $\alpha$ -SMA, IL6 and IL8 in the harvested xenografts related to Fig.6A-C. Scale

133 bars, 50  $\mu$ m. C, Picture of the harvested xenografts related to Fig.6D (n=8 per group).

134 **D**, Quantification for TUNEL<sup>+</sup> cells in the xenografts related to Fig.6E (mean  $\pm$  SEM,  
135 n=8 per group). \*\*\*P < 0.001 by two-tailed one-way ANOVA with Dunnett's multiple  
136 comparison test. **E**, Picture of the harvested xenografts related to Fig.6F (n=8 per group).  
137

138 **Supplementary Tables**

139

140 **Supplementary Table 1. Targeting sequences for shRNA**

| Name    | shRNA1                      | shRNA2                      |
|---------|-----------------------------|-----------------------------|
| PITPNM3 | 5'-GGGAGAAGUGGCUUCGUAATT-3' | 5'-CGCGCAUGAUCCUGCGCAATT-3' |
| P65     | 5'-GAGUCAGAUCAGCUCCUAA-3'   | 5'-GCUAUAACUCGCCUAGUGA-3'   |
| IL-6    | 5'-CTTCCAATCTGGATTCAAT-3'   | 5'-CCCAGGAGAAGATTCCAAA-3'   |
| IL-8    | 5'-GAAGAGGGCTGAGAATTCA-3'   | 5'-GCCAGATGCAATACAAGAT-3'   |

141

142 **Supplementary Table 2. Primer sequences for qPT-PCR**

| Name   | Forward                        | Reverse                        |
|--------|--------------------------------|--------------------------------|
| CD10   | 5'-TGGATCTTGTAAGCAGCCTCA-3'    | 5'-GCACAACGTCTCCAAGTTGC-3'     |
| GPR77  | 5'-CTGCTGACCATGTATGCCAG-3'     | 5'-CGCTGAACCGTAGACCACC-3'      |
| ACTA2  | 5'-AAAAGACAGCTACGTGGGTGA-3'    | 5'-GCCATGTTCTATCGGGTACTTC-3'   |
| FAP    | 5'-ATGAGCTTCCTCGTCCAATTCA3'    | 5'-AGACCACCAGAGAGCATATTTTG3'   |
| COL1A1 | 5'-GAGGGCCAAGACGAAGACATC3'     | 5'-CAGATCACGTCATCGCACAAAC3'    |
| COL3A1 | 5'-GGAGCTGGCTACTTCTCGC3'       | 5'-GGGAACATCCTCCTTCAACAG3'     |
| IL-6   | 5'-AAGCCAGAGCTGTGCAGATGAGTA-3' | 5'-TGTCTGCAGCCACTGGTTC-3'      |
| IL-8   | 5'-ACACTGCGCCAACACAGAAATTA-3'  | 5'-TTTGCTTGAAGTTTCACTGGCATC-3' |
| GAPDH  | 5'-GGAGCGAGATCCCTCCAAAAT-3'    | 5'-GGCTGTTGTCATACTTCTCATGG-3'  |

143
